# Supplementary material
Source: HighWire-hosted journal article supplement (https://www.cmajopen.ca/content/suppl/2021/09/24/9.3.E886)
Supplement: open-2020-0164-original-submission.pdf [file open-2020-0164-original-submission.pdf]

**Editor's note**

The original submission of this manuscript contained data from the First Nations people who are members of communities in the Kenora Chiefs Advisory. However, because of an institutional error in retrieving data usage permissions from the Kenora Chiefs Advisory, the authors were required to exclude these data from their analyses. As such, the original submission is not available as supplementary material. Please note that these data represented a small subset of the study data and their exclusion did not change the overall results of the paper.

Dr. Diane Kelsall  
Editor, *CMAJ Open*
